# Supplementary material for: Response of Bolivian gray titi monkeys ( Plecturocebus donacophilus ) to an anthropogenic noise gradient: behavioral and hormonal correlates
Source: PeerJ journal article supplement (doi:10.7717/peerj.10417), 2020-11-20
Supplement: Article-S2.pdf [file Article-S2.pdf]

# **Enzyme-immunoassay of fecal cortisol in Bolivian gray titi monkeys, *Plecturocebus donacophilus*. Parallelism test and validation.**

Amélie Chimènes and Audrey Maille

Unité Eco-anthropologie UMR 7206, Museum National d'Histoire Naturelle, CNRS, Université de Paris, Paris, France

## **1. Reception of the fecal samples of titis (December 31, 2018).**

Dr. Patrice Adret, Research Associate at the Museo de Historia Natural Noel Kempff Mercado de Sante Cruz de la Sierra, brought us 30 fecal samples (0.1g each) kept inside 15ml polypropylene tubes in an aqueous solution of 2.5 ml of distilled water and 2.5ml of 96° ethanol. The fresh samples were collected between 03/11/2017 and 05/04/2018 and came from 19 individuals, both adults and young, distributed in 6 family groups. The samples had been kept in a freezer until they were exported to France by Dr. Adret himself who carried them along in a polystyrene container with ice packs, together with proper documentation (Figure 1).

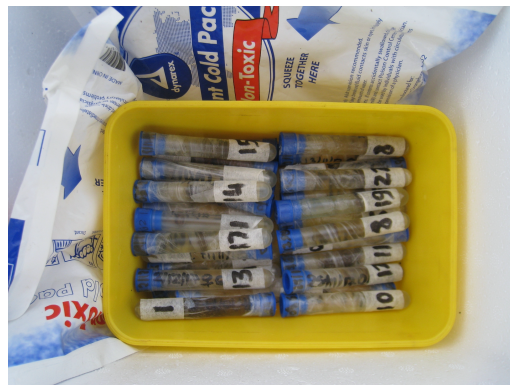

Figure 1. Samples ready for exportation to France.

The meeting took place with Dr. Audrey Maille at the Musée de l'Homme in Paris, France. Subsequently, the tests were carried out by Ms. Amélie Chimènes, Assistant Engineer at the **Palaeogenomics and Molecular Genetics laboratory** of the UMR 7206 directed by Professor Evelyne Heyer.

## 2. Extraction and drying (January 7 and 8, 2019).

To start with, the contents of the tubes were transferred into 50ml polypropylene tubes to which was added 10ml of absolute ethanol to reach the minimum of 80% alcohol necessary for the complete extraction of fecal cortisol [1-2]. After having vortexed the mixture for 1 minute, the samples remained 4 hours at rest to carry out the extraction. At the end of these 4 hours, 2 ml of supernatant were collected in a 2 ml Eppendorf tube and were stored at 4°C. The following day, 0.5 ml of extract was transferred to a 1.5 ml Eppendorf tube and placed in a desiccator (Concentrator plus by Eppendorf, Figure 2). The drying lasted 4 hours at 1400 rpm. The tubes were then stored at 4°C.

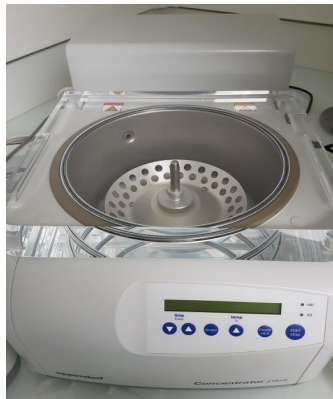

Figure 2. Desiccator used for drying the samples

## 3. Measurement of fecal cortisol using an EIA assay

The awarded ELISA kit sent by post from the USA was unusable after the customs blocked delivery for too long because storage for one month at room temperature invalidates the quality of the reagents. Therefore, by mutual agreement between Dr. Adret and Dr. Maille, it was agreed to use the salivary cortisol assay kits from Salimetrics © (Lot 1701514) purchased by the Paleogenomics platform for Dr. Maille and which was used for detection of cortisol in feces of bonobos, chimpanzees, orangutans and baboons in another research project (article in preparation).

The antibody used in this IEA kit from Salimetrics © has a high affinity for cortisol (< 0.007 µg/dL) and shows little cross-reactivity with dexamethasone (19.2%), prednisolone (0.57%), corticosterone (0.21%), 11-deoxycortisol (0.16%) and other steroid components (less than 0.15%). Sensitivity of the assay is 0.028 µg/dL (range: 0.012-3.000 µg/dL).

Control tests had to be carried out to validate the use of this EIA assay for cortisol measurement in the fecal samples of titis (*Plecturocebus donacophilus*).

**a) First assay: Parallelism test on four fecal samples (January 9, 2019)**

In an EIA (Enzyme Immuno Assay), the parallelism test allows both to choose the dilution rate necessary for the determination of a biological element according to the starting material and to ensure the proper functioning of the kit dosing.

***Methods for the parallelism test***

The complete protocol is visible in appendix 1. It consists of several phases:

- Rehydration of the dried samples with 0.5 ml of test buffer provided in the kit.
- Dilution of 4 samples chosen according to diversity criteria (weight, sex, age, dominance...) with each sample coming from a different group.
- Blanking, standards, controls and samples (in duplicates: Table 1)

Table 1: Plate layout for the blank (A1 and A2) standards (B1:G1 and B2:G2), controls (H1, H2, A3, A4), and 4 samples used for the parallelism test (B3:H3, B4:H4, A5:H5, A6:H6, A7:E7, A8:E8)

|   | 1      | 2      | 3      | 4      | 5       | 6       | 7       | 8       | 9 | 10 | 11 | 12 |
|---|--------|--------|--------|--------|---------|---------|---------|---------|---|----|----|----|
| A | Blanc  | Blanc  | Ctrl L | Ctrl L | 8 1/4   | 8 1/4   | 19      | 19      |   |    |    |    |
| B | St1    | St1    | 5      | 5      | 8 1/8   | 8 1/8   | 19 1/2  | 19 1/2  |   |    |    |    |
| C | St2    | St2    | 5 1/2  | 5 1/2  | 8 1/16  | 8 1/16  | 19 1/4  | 19 1/4  |   |    |    |    |
| D | St3    | St3    | 5 1/4  | 5 1/4  | 16      | 16      | 19 1/8  | 19 1/8  |   |    |    |    |
| E | St4    | St4    | 5 1/8  | 5 1/8  | 16 1/2  | 16 1/2  | 19 1/16 | 19 1/16 |   |    |    |    |
| F | St5    | St5    | 5 1/16 | 5 1/16 | 16 1/4  | 16 1/4  |         |         |   |    |    |    |
| G | St6    | St6    | 8      | 8      | 16 1/8  | 16 1/8  |         |         |   |    |    |    |
| H | Ctrl H | Ctrl H | 8 1/2  | 8 1/2  | 16 1/16 | 16 1/16 |         |         |   |    |    |    |

- Addition of the enzyme conjugate and reaction for 1 hour with a mixture of 5 minutes.
- Washes to remove supernumerary complexes, free cortisol and unbound antibodies.
- Addition of the substrate that will color the complexes in blue (Figure 3).

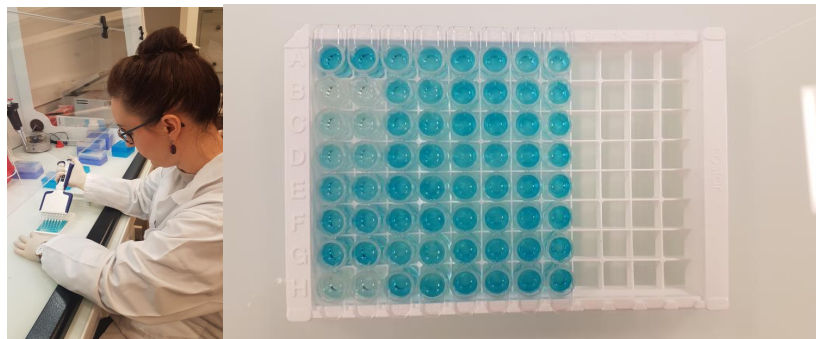

Figure 3. Work under Microbiological Safety Hood (left). Coloring after addition of the substrate (right).

- Reaction for 25 minutes.

- Addition of the stop solution which will transform the blue color into yellow, readable in the visible at 450 nm using a spectrophotometer (Figure 4).

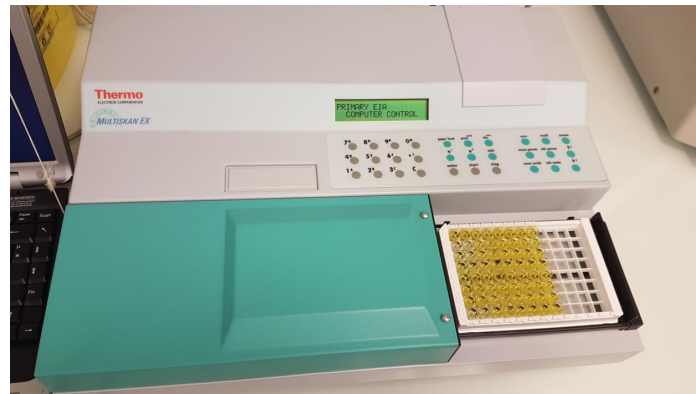

Figure 4. Spectrophotometer and coloring of the plate after addition of the stop solution.

The amount of cortisol assayed in the samples is therefore be inversely proportional to the absorbance measured by the spectrophotometer. We used a logarithmic scale and the 4PL (Four-parameter log-logistic) method to analyze the results. The principle of this competitive sandwich ELISA (Enzyme Linked Immuno Sorbent Assay) is represented in Figure 5.

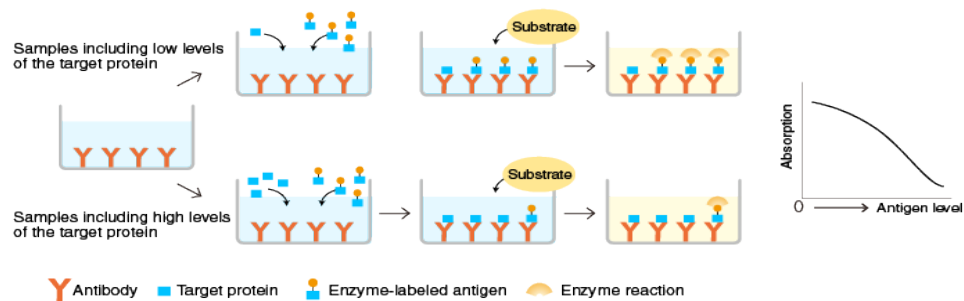

Figure 5. Schematic representation of the competitive sandwich ELISA test.

### ***Results of the parallelism test***

The complete results are collated in the form of an Excel file consisting of several tabs (values of absorbance: Table 2).

Table 2: Values of absorbance for the blank (A1 and A2) standards (B1:G1 and B2:G2), controls (H1, H2, A3, A4), and 4 samples used for the parallelism test (B3:H3, B4:H4, A5:H5, A6:H6, A7:E7, A8:E8)

|   | 1     | 2     | 3     | 4     | 5     | 6     | 7     | 8     | 9 | 10 | 11 | 12 |
|---|-------|-------|-------|-------|-------|-------|-------|-------|---|----|----|----|
| A | 2.052 | 2.047 | 1.351 | 1.331 | 1.734 | 1.747 | 1.367 | 1.348 |   |    |    |    |
| B | 0.169 | 0.174 | 1.300 | 1.390 | 1.842 | 1.804 | 1.550 | 1.516 |   |    |    |    |
| C | 0.427 | 0.377 | 1.464 | 1.552 | 1.833 | 1.845 | 1.708 | 1.656 |   |    |    |    |
| D | 0.826 | 0.748 | 1.688 | 1.754 | 1.360 | 1.376 | 1.846 | 1.742 |   |    |    |    |
| E | 1.388 | 1.332 | 1.785 | 1.964 | 1.576 | 1.599 | 1.865 | 1.784 |   |    |    |    |
| F | 1.784 | 1.757 | 1.888 | 1.926 | 1.804 | 1.805 |       |       |   |    |    |    |
| G | 1.900 | 1.907 | 1.337 | 1.465 | 1.852 | 1.829 |       |       |   |    |    |    |
| H | 0.414 | 0.400 | 1.721 | 1.770 | 1.931 | 2.090 |       |       |   |    |    |    |

Since the values obtained for the standards fitted well on a logarithmic scale, the 4PL (Four-parameter log-logistic) method could be used to analyze the results (Figure 6). The internal controls were validated with a mean cortisol value of 0.896 µg/dL for the Control High (range: 0.985 ± 0.246 µg/dL) and 0.117µg/dL for the Control Low (range: 0.097 ± 0.024 µg/dL).

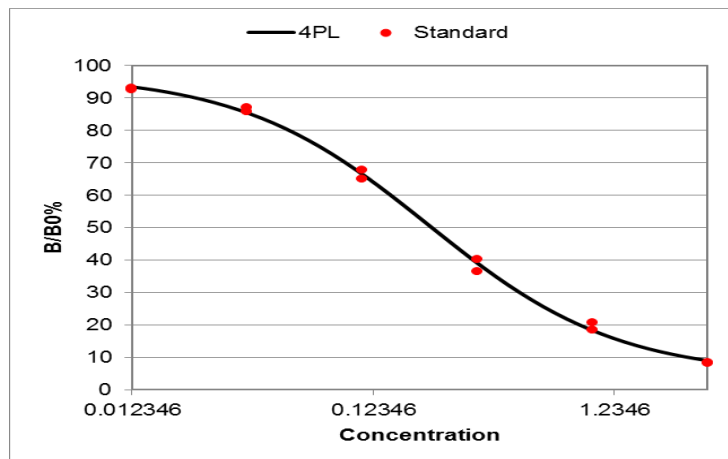

Figure 6. Logarithmic curve of the standards according to the 4PL configuration for the first assay: sinusoidal curve for which extreme values lead to a plateau that is not representative of the actual cortisol values.

The mean percentage of accuracy for the parallelism test is 176.43 ± 20.72 %. The cortisol concentrations of the four diluted samples were not accurate as they differed widely from the expected values calculated by dividing the concentration obtained with no dilution with the coefficients of dilution applied to the samples; Figure 7).

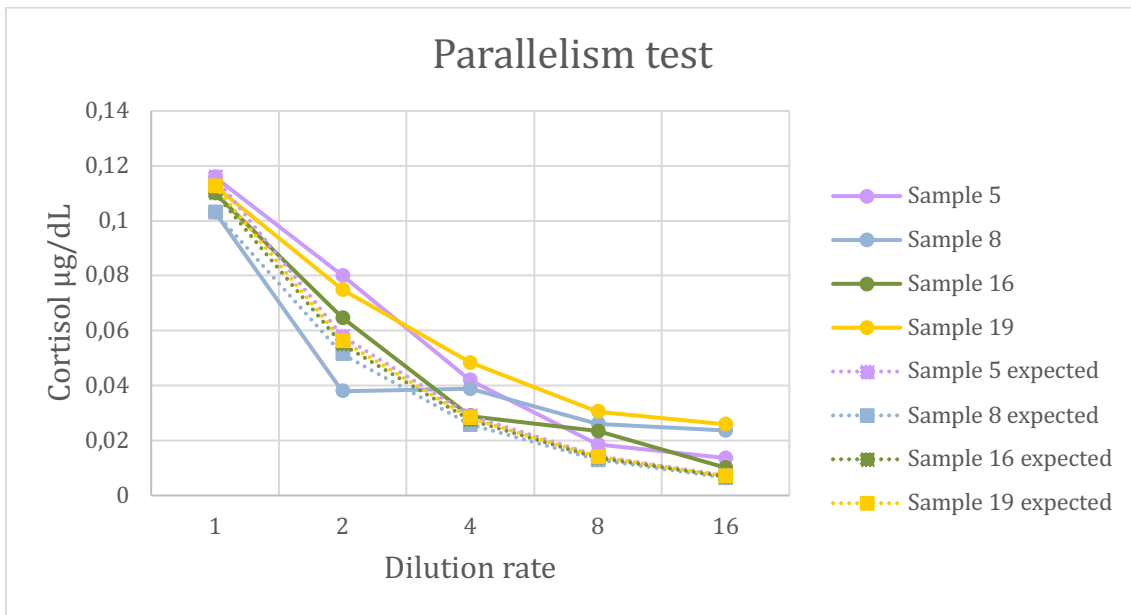

Figure 7: Measured concentrations and expected concentrations of the 4 selected samples, for each dilution rate.

Table 3: Percentages of accuracy for the diluted samples in the parallelism test. Samples with a different background color refer to a subset of four individuals differing by age, sex and group membership. Sample 5 in purple: infant from G3; sample 8 in blue: subadult from G6; sample 16 in green: juvenile from G1; sample 19 in yellow: adult male from G2. Values highlighted in orange: CV is out of 15% range. Values written in red: % accuracy above 150%.

| Samples | Dilution | Measured cortisol in µg/dL | Expected cortisol in µg/dL | % accuracy |
|---------|----------|----------------------------|----------------------------|------------|
| 5       | 1        | 0.1159                     | -                          | -          |
| 8       | 1        | 0.1031                     | -                          | -          |
| 16      | 1        | 0.1101                     | -                          | -          |
| 19      | 1        | 0.1126                     | -                          | -          |
| 5       | 2        | 0.0801                     | 0.0580                     | 138.22     |
| 8       | 2        | 0.0380                     | 0.0516                     | 73.75      |
| 16      | 2        | 0.0647                     | 0.0551                     | 117.53     |
| 19      | 2        | 0.0750                     | 0.0563                     | 133.13     |
| 5       | 4        | 0.0420                     | 0.0290                     | 144.95     |
| 8       | 4        | 0.0388                     | 0.0258                     | 150.46     |
| 16      | 4        | 0.0289                     | 0.0275                     | 104.81     |
| 19      | 4        | 0.0483                     | 0.0282                     | 171.69     |
| 5       | 8        | 0.0185                     | 0.0145                     | 127.70     |
| 8       | 8        | 0.0261                     | 0.0129                     | 202.37     |
| 16      | 8        | 0.0235                     | 0.0138                     | 170.39     |
| 19      | 8        | 0.0306                     | 0.0141                     | 217.34     |
| 5       | 16       | 0.0136                     | 0.0072                     | 188.27     |
| 8       | 16       | 0.0237                     | 0.0064                     | 367.33     |
| 16      | 16       | 0.0101                     | 0.0069                     | 146.92     |
| 19      | 16       | 0.0259                     | 0.0070                     | 368.03     |

We assume that, from the 1/8<sup>th</sup> dilution, the values were not easily distinguishable because the cortisol concentrations of the four selected samples were already very low (mean  $\pm$  SE= 0.110  $\pm$  0.003; Table 3), and hence dramatically close to the lowest values that can be detected by the assay when they were diluted at 1/8 and 1/16 (i.e. detectability range = 0.012-3.000  $\mu$ g/dL).

In addition, two values had to be excluded because intra-assay coefficient of variability CV (i.e. a numerical ratio used to describe the level of variability within a population independently of the absolute values of the observations) was too high. On duplicates, we generally admit a maximum CV of 15% (Table 3).

It should be noted that the values obtained for the four non-diluted samples were almost identical, indicating a lack of variability in cortisol levels, which was unexpected considering that samples from four different individuals varying in age, sex, and dominance had been selected.

**Conclusion:** Because of the very low measured cortisol levels and a small variation in cortisol levels between the four selected samples, the parallelism test is therefore impossible to fully validate. One may however notice that this test gave some accurate results for the first dilutions steps. Following dosing of the samples had to be carried out without dilution since the values of the pure dosages of the 4 selected samples were in the middle of the range.

**b) Second assay: Validation with dose-dependent test and dosing of the remaining samples (January 11, 2019)**

The dose-dependent test is another control that assess whether a kit can be used for the determination of cortisol in a new species (here titi monkeys, *P. donacophilus*). This test evaluates the accuracy of this ELISA by adding a known quantity of a sample (or a mixture of samples) to 3 standard solutions of increasing concentration.

***Methods for the dose-dependent test***

Here, we took the 4 samples used for the parallelism test and, for each sample, we added 12.5  $\mu$ L of sample solution to 12.5  $\mu$ L of standard solutions 2 (Std 2: [cortisol] =[1.000

$\mu\text{g/dL}$ ) 3 (Std3: [cortisol] = 0.333  $\mu\text{g/dL}$ ) or 4 (Std4 : [cortisol] = 0.111  $\mu\text{g/dL}$ ). We expected the curves obtained for mixtures of standard solutions + samples to be parallel. In addition, we filled 50 remaining wells of the plate to measure the concentrations of the 25 fecal samples of titis that had not been measured yet (samples were dosed in duplicates: 25 samples x 2 wells, Table 4)

Table 4: Plate layout for the blank (A1 and A2) standards (B1:G1 and B2:G2), controls (H1, H2, A3, A4), 25 samples (B3:H3, B4:H4, A5:H5, A6:H6, A7:H7, A8:H8, A9:D9, A10:D10) and 3 samples used for the dose-dependant test (E9:H9, E10:H10, A11-H11, A12-H12)

|   | 1      | 2      | 3      | 4      | 5  | 6  | 7  | 8  | 9  | 10 | 11  | 12  |
|---|--------|--------|--------|--------|----|----|----|----|----|----|-----|-----|
| A | Blanc  | Blanc  | Ctrl L | Ctrl L | 10 | 10 | 20 | 20 | 27 | 27 | 8M  | 8M  |
| B | St1    | St1    | 1      | 1      | 11 | 11 | 21 | 21 | 28 | 28 | 8+  | 8+  |
| C | St2    | St2    | 2      | 2      | 12 | 12 | 22 | 22 | 29 | 29 | 16- | 16- |
| D | St3    | St3    | 3      | 3      | 13 | 13 |    |    | 30 | 30 | 16M | 16M |
| E | St4    | St4    | 4      | 4      | 14 | 14 | 23 | 23 | 5- | 5- | 16+ | 16+ |
| F | St5    | St5    | 6      | 6      | 15 | 15 | 24 | 24 | 5M | 5M | 19- | 19- |
| G | St6    | St6    | 7      | 7      | 17 | 17 | 25 | 25 | 5+ | 5+ | 19M | 19M |
| H | Ctrl H | Ctrl H | 9      | 9      | 18 | 18 | 26 | 26 | 8- | 8- | 19+ | 19+ |

The protocol was similar to the one used for the parallelism test, with measure of absorbance used to infer cortisol concentrations (Figure 8).

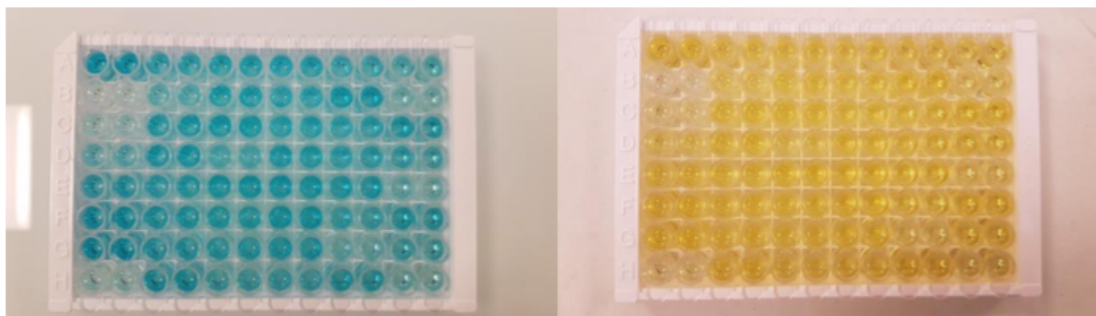

Figure 8. Plates before and after addition of the stop solution.



## Results of the assay

The complete results are collated in the form of an Excel file (values of absorbance: Table 5).

Table 5: Values of absorbance for the blank (A1 and A2) standards (B1:G1 and B2:G2), controls (H1, H2, A3, A4), 25 samples (B3:H3, B4:H4, A5:H5, A6:H6, A7:H7, A8:H8, A9:D9, A10:D10) and 3 samples used for the dose-dependant test (E9:H9, E10:H10, A11-H11, A12-H12)

|   | 1     | 2     | 3     | 4     | 5     | 6     | 7     | 8     | 9     | 10    | 11    | 12    |
|---|-------|-------|-------|-------|-------|-------|-------|-------|-------|-------|-------|-------|
| A | 2.122 | 2.045 | 1.392 | 1.384 | 1.500 | 1.505 | 1.457 | 1.517 | 1.220 | 1.232 | 1.032 | 1.089 |
| B | 0.203 | 0.193 | 0.848 | 0.890 | 1.381 | 1.485 | 1.323 | 1.290 | 1.726 | 1.701 | 0.598 | 0.641 |
| C | 0.413 | 0.391 | 1.418 | 1.491 | 1.489 | 1.488 | 1.212 | 1.264 | 1.158 | 1.178 | 1.430 | 1.426 |
| D | 0.867 | 0.825 | 1.464 | 1.466 | 0.822 | 0.836 | 1.350 | 1.286 | 1.178 | 1.200 | 1.174 | 1.081 |
| E | 1.412 | 1.411 | 1.245 | 1.294 | 1.477 | 1.523 | 1.465 | 1.425 | 1.298 | 1.370 | 0.642 | 0.634 |
| F | 1.822 | 1.787 | 1.430 | 1.380 | 1.325 | 1.269 | 1.502 | 1.530 | 1.094 | 1.065 | 1.455 | 1.455 |
| G | 1.959 | 1.930 | 1.320 | 1.285 | 1.226 | 1.281 | 1.424 | 1.382 | 0.601 | 0.607 | 1.092 | 1.113 |
| H | 0.403 | 0.412 | 1.599 | 1.611 | 1.086 | 1.113 | 1.198 | 1.154 | 1.433 | 1.397 | 0.663 | 0.680 |

Since the values obtained for the standards fitted well on a logarithmic scale, the 4PL (Four-parameter log-logistic) method could be used to analyze the results (Figure 9).

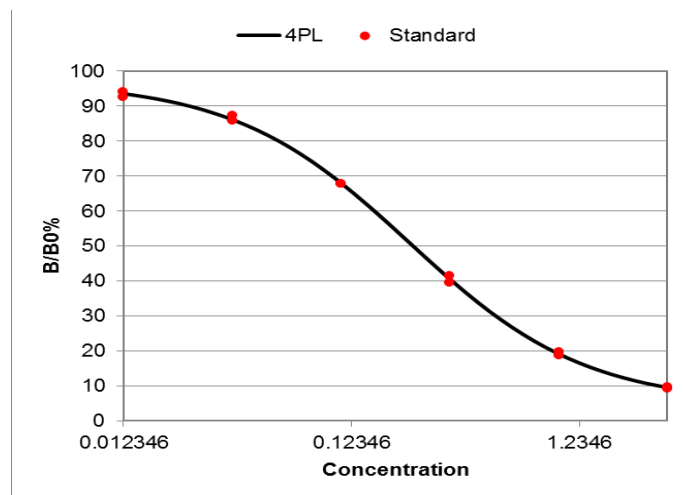

Figure 9. Logarithmic curve of the standards according to the 4PL configuration for the second assay: sinusoidal curve for which extreme values lead to a plateau that is not representative of the actual cortisol values.

The internal controls were validated with a mean cortisol value of 0.973  $\mu\text{g/dL}$  for the Control High (range:  $0.985 \pm 0.246 \mu\text{g/dL}$ ) and 0.118  $\mu\text{g/dL}$  for the Control Low (range:  $0.097 \pm 0.024 \mu\text{g/dL}$ ).

For the dose-dependent test, the expected values were calculated by averaging the cortisol value of the pure sample obtained at the time of the parallelism test and the cortisol value of the standard used. The curves obtained for mixtures of standard solutions + samples to

be parallel. (Figure 10). For this dose-dependent test, we found a percentage of accuracy of  $91.11 \pm 2.37$  (mean  $\pm$  SE; Table 6).

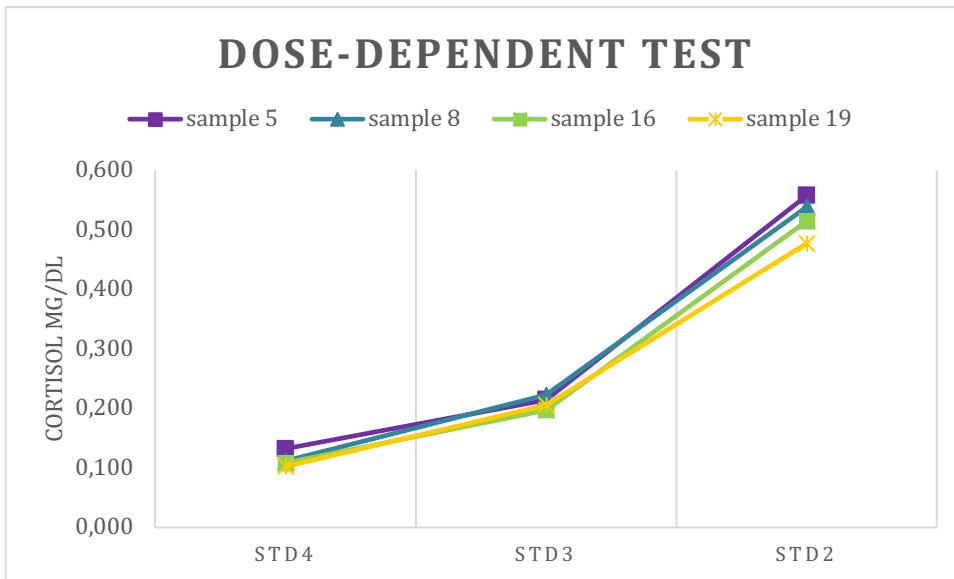

Figure 10: Measured concentrations for the mixtures of standards solutions and each of the 4 selected samples.

Table 6: Percentages of accuracy for the four selected samples in the dose-dependent test ( addition of Std4 [cortisol] = 0.111 µg/dL, Std3 [cortisol] = 0.333 µg/dL, or Std2 [cortisol] = 1.000 µg/dL). addition of Samples with a different background color refer to a subset of four individuals differing by age, sex and group membership. Sample 5 in purple: infant from G3; sample 8 in blue: subadult from G6; sample 16 in green: juvenile from G1; sample 19 in yellow: adult male from G2.

| Samples           | Measured cortisol in µg/dL | Expected cortisol in µg/dL | % accuracy |
|-------------------|----------------------------|----------------------------|------------|
| <b>5 + Std4</b>   | 0.132                      | 0.113                      | 116.615    |
| <b>5 + Std3</b>   | 0.215                      | 0.224                      | 95.567     |
| <b>5 + Std 2</b>  | 0.557                      | 0.558                      | 99.884     |
| <b>8 + Std4</b>   | 0.112                      | 0.107                      | 104.344    |
| <b>8 + Std3</b>   | 0.222                      | 0.218                      | 101.995    |
| <b>8 + Std 2</b>  | 0.538                      | 0.552                      | 97.580     |
| <b>16 + Std4</b>  | 0.109                      | 0.111                      | 98.146     |
| <b>16 + Std3</b>  | 0.197                      | 0.222                      | 88.874     |
| <b>16+ Std 2</b>  | 0.515                      | 0.555                      | 92.712     |
| <b>19 + Std4</b>  | 0.102                      | 0.112                      | 91.503     |
| <b>19 + Std3</b>  | 0.206                      | 0.223                      | 92.280     |
| <b>19 + Std 2</b> | 0.477                      | 0.556                      | 85.781     |

The fecal cortisol concentrations for the 30 samples showed little variability in the measured values, with only two samples being above the average multiplied by two (Table 3).

Table 3: Cortisol concentrations for the 30 samples. Values in orange: high values > 2 x mean)

| Sample | Date       | Group | Individual   | CORTISOL $\mu\text{g/dL}$ |
|--------|------------|-------|--------------|---------------------------|
| 1      | 17/10/2017 | G5    | Adult female | 0.319                     |
| 2      | 30/10/2017 | G5    | Adult male   | 0.103                     |
| 3      | 03/11/2017 | G6    | Infant       | 0.100                     |
| 4      | 03/11/2017 | G6    | Juvenile     | 0.150                     |
| 5      | 11/11/2017 | G3    | Infant       | 0.116                     |
| 6      | 11/11/2017 | G3    | Juvenile     | 0.114                     |
| 7      | 13/11/2017 | G4    | Adult female | 0.141                     |
| 8      | 18/11/2017 | G6    | Sub adult    | 0.103                     |
| 9      | 22/11/2017 | G2    | Adult female | 0.071                     |
| 10     | 23/11/2017 | G2    | Adult male   | 0.092                     |
| 11     | 28/11/2017 | G3    | Adult female | 0.108                     |
| 12     | 28/11/2017 | G3    | Adult female | 0.095                     |
| 13     | 02/12/2017 | G5    | Adult female | 0.344                     |
| 14     | 02/12/2017 | G5    | Juvenile     | 0.092                     |
| 15     | 09/12/2017 | G1    | Adult female | 0.142                     |
| 16     | 09/12/2017 | G1    | Juvenile     | 0.110                     |
| 17     | 09/12/2017 | G1    | Juvenile     | 0.155                     |
| 18     | 12/12/2017 | G2    | Adult male   | 0.207                     |
| 19     | 12/12/2017 | G2    | Adult male   | 0.113                     |
| 20     | 19/12/2017 | G4    | Juvenile     | 0.095                     |
| 21     | 16/01/2018 | G2    | Juvenile     | 0.140                     |
| 22     | 16/03/2018 | G5    | Adult female | 0.160                     |
| 23     | 20/03/2018 | G3    | Adult male   | 0.105                     |
| 24     | 20/03/2018 | G3    | Adult male   | 0.089                     |
| 25     | 22/03/2018 | G4    | Adult male   | 0.115                     |
| 26     | 28/03/2018 | G5    | Adult female | 0.179                     |
| 27     | 28/03/2018 | G5    | Juvenile     | 0.163                     |
| 28     | 05/04/2018 | G2    | Juvenile     | 0.051                     |
| 29     | 05/04/2018 | G1    | Adult female | 0.182                     |
| 30     | 05/04/2018 | G1    | Adult female | 0.175                     |

**Conclusions:** The dosage of titi monkeys' fecal cortisol with the Salimetrics kit worked perfectly. There is little variability in the measured concentrations, with only two samples above the average multiplied by two.

## Literature cited

1. Behringer V. & Deschner T. 2017. Non-invasive monitoring of physiological markers in primates. *Hormones and Behavior* 91: 3-18.
2. Kalbitzer U. & Heistermann M. 2013. Long-term storage effects in steroid metabolite extracts from baboon (*Papio sp.*) faeces – A comparison of three commonly applied storage methods. *Methods in Ecology and Evolution* 4 (5): 493-500.

## Annex 1: Protocol for the determination of cortisol from faeces using the Salimetrics kit

1) Take out the components of the kit (1h30 before the start of the dosage).

!! The plate is sensitive to humidity, you must leave it in your pocket while it heats up.

2) Dissolution of the samples:

Add 0.5 mL of test buffer to the tubes containing the dry extract (otherwise PBS 1X + 20% ethanol). Shake and then vortex until the pellet is re-dissolved; then put the samples in a water bath (37° C for 30 min). When leaving the water bath, vortex again. If the whole pellet is not re-dissolved, use a micropipette to peel off the rest of the pellet.

Parallelism: make a 2 in 2 dilution with 100 µl of pure solution and 100 µl of test buffer (1/2 to 1/16th).

Test: make the chosen dilution with the parallelism test (test buffer).

Dose-dependent: Add 30 µl of sample diluted with 30 µl of 3 known concentrations of cortisol (high, medium and low).

3) Preparation of the washing solution (1X buffer):

Prepare 150 mL of buffer solution diluted 1:10 (15 mL of buffer solution and 135 mL of distilled water).

!! The diluted solution cannot be stored and should be used on the same day.

!! The value of 150 mL was calculated by counting 4 washes of 96 wells, at the rate of 300 µL per wash.

4) Plate layout:

Determine a plate layout: note the number of associated samples or the range/control number for each well.

5) Well arrangement:

Detach the wells (in strips of 8) and place them on the plate.

6) Preparation of the dilution of the conjugate:

Pipette 24 mL of diluent ("assay diluent") into a tube (minimum 25 mL) to prepare step 9.

7) Filling the wells: Pipette 25  $\mu$ L of:

- standard (6 wells)
- controls (2 wells)
- samples (80 wells)

!! Ideally, the plate should be ready in less than 20 min.

8) Dilution of the conjugate and arrangement in the wells:

1: 1600 dilution: add 15  $\mu$ L of conjugate ("cortisol enzyme conjugate") to the tube containing the 24 mL of diluent and shake.

Immediately put 200  $\mu$ L of this solution in each well.

Note if the wells turn to dark yellow or purple color. If so, use pH strips to determine the pH of the samples.

!! The dosage may be distorted if the pH exceeds 9 or is less than 3.5.

9) Incubation:

Mix (5 min at 500 rpm) and incubate at room temperature for 55 min.

10) Washing:

Wash in 4 times with 1X buffer (prepared in step 3).

With a plate washer or by placing 250  $\mu$ L of buffer in each well, then inverting the plate over a sink and wiping carefully with paper before putting it back in the place.

11) Addition of the TMB:

Put 200  $\mu$ L of solution ("TMB substrate solution") in each well.

12) Incubation:

Mix (3 min at 500 rpm) and incubate at room temperature in the dark for 25 min.

13) Stop the reaction:

Add 50  $\mu$ L of stop solution ("3M stop solution").

14) Soft mixing and reading:

Mix (3 min at 500 rpm), wipe the plate (the bottom) and read at 450 nm within 10 min following the addition of the stop solution.

!! If the mixture exceeds 600 rpm, liquid may spill.

!! Samples with a value greater than or equal to 3 $\mu$ g/dL (82.7 nmol / L, 30 ng/mL) must be diluted and then reassessed.
